# NOVEL ORGAN-SPECIFIC GENETIC FACTORS FOR QUANTITATIVE RESISTANCE TO LATE BLIGHT IN POTATO

1 **Deissy Katherine Juyo Rojas<sup>1</sup>** [orcid.org/0000-0001-6220-2554](https://orcid.org/0000-0001-6220-2554), **Johana Carolina Soto Sedano<sup>2</sup>**  
2 **[orcid.org/0000-0001-7890-4403](https://orcid.org/0000-0001-7890-4403)**, **Agim Ballvora<sup>3</sup>** [orcid.org/0000-0003-0949-8311](https://orcid.org/0000-0003-0949-8311), **Jens Léon<sup>3</sup>**  
3 **[orcid.org/0000-0002-6514-3112](https://orcid.org/0000-0002-6514-3112)**, **Teresa Mosquera Vásquez<sup>1</sup>** [orcid.org/0000-0003-4854-1079](https://orcid.org/0000-0003-4854-1079) \*

4

5 1. Universidad Nacional de Colombia, sede Bogotá, Facultad de Ciencias Agrarias, Carrera 30  
6 No. 45 - 03, Building 500 Bogotá, Colombia.

7 2. Universidad Nacional de Colombia, sede Bogotá, Facultad de Ciencias, Carrera 30 No. 45 - 03,  
8 Building 421 Bogotá, Colombia.

9 3. University of Bonn, Institute of Crop Science and Resource Conservation (INRES)  
10 Katzenburgweg 5, D-53115 Bonn, Germany.

11 \* **Correspondence:**

12 Corresponding Author

13 [tmosquerav@unal.edu.co](mailto:tmosquerav@unal.edu.co) telephone number 571- 3165000 ext. 19101

14 **Keywords: leaves resistance, stem resistance, Group Phureja, Phytophthora infestans, candidate**  
15 **resistance gene.**

16 **Abstract**

17 Potato, *Solanum tuberosum*, is one of the highest consumed food in the world, being the basis of the  
18 diet of millions of people. The main limiting and destructive disease of potato is late blight, caused by  
19 *Phytophthora infestans*. Here, we present a multi-environmental analysis of the response to *P. infestans*

20 using an association panel of 150 accessions of *S. tuberosum* Group Phureja, evaluated in two localities  
21 in Colombia. Disease resistance data were merged with a genotyping matrix of 83,862 SNPs obtained  
22 by 2b-restriction site-associated DNA and Genotyping by sequencing approaches into a Genome-wide  
23 association study. We are reporting 16 organ-specific QTL conferring resistance to late blight. These  
24 QTL explain from 13.7% to 50.9% of the phenotypic variance. Six and ten QTL were detected for  
25 resistance response in leaves and stem, respectively. *In silico* analysis revealed 15 candidate genes for  
26 resistance to late blight. Four of them have no functional genome annotation, while eleven candidate  
27 genes code for diverse proteins, including one leucine-rich repeat kinase.

28

## 29 **1. Introduction**

30 Potato (*Solanum tuberosum*) is the most important non-cereal crop and plays a basic role for the food  
31 security and nutrition [1]. Also, potatoes are an important crop for farmers and consumers because of  
32 its ability to efficiently transform inputs into a high-quality food with an excellence consumer  
33 acceptance.

34 The predominately cultivated potato species worldwide is *S. tuberosum* L. ( $2n=4x=48$ ), this species  
35 contains two groups: Chilotanum (tetraploid potato) and Andigenum [2]. The Group Andigenum has  
36 a subset of diploid potatoes ( $2n=2x=24$ ), the Group Phureja [3]. Phureja has been used worldwide as a  
37 genetic source and has contributed to understand the genetic basis of several agronomic traits of potato.  
38 It is worth to notice that the current potato reference genome sequence is obtained from DM1-3516  
39 R44 a Phureja genotype [4].

40 Potato, as any other vegetative multiplied crop, is affected by several pests and diseases and the most  
41 devastating disease affecting this crop is late blight caused by the oomycete *Phytophthora infestans*  
42 [5–8]. Late blight has been reported in the main regions where potato is grown, including more than  
43 130 countries distributed over Asia, Africa, Oceania, Europe, South, Central and North America [9].

44 Thereby, great concern exists worldwide for possible emergence of new *P. infestans* strains as well as  
45 for the number of countries affected by the disease that could be increasing. Although chemical control  
46 of late blight is possible, the best alternative is through the use of resistant varieties. In potato, both,  
47 pathotype-specific (vertical resistance) and race non-specific resistance (field, horizontal, polygenic or  
48 partial resistance) have been reported [6,7,10–12].

49 The potato breeding programs worldwide are focused to obtain late blight resistant cultivars through  
50 conventional breeding [13–15]. Despite these programs have successfully developed partial resistant  
51 cultivars [16], several challenges remain to be faced. If the selection is based on vertical resistance  
52 exists the risk of its breakdown caused by an eventual emergence of new *P. infestans* races [11], but if  
53 the selection is based on horizontal resistance, this is highly dependent on the environmental  
54 conditions, as well as on the pathogen strains. Thus, the cultivar resistance could change depending on  
55 the geographic region [17]. To face these challenges, it is important the detection of quantitative trait  
56 loci (QTL) that govern late blight resistance in both tetraploid and diploid potatoes, through methods  
57 based on genetic variants capture by DNA molecular markers such as Genome-wide association studies  
58 (GWAS) and on multi-environmental phenotyping. This will reduce the time required in the process,  
59 and also will contribute to a better understanding of the genetic basis of potato - *P. infestans* interaction.

60 In potato, several successful association mapping studies have been achieved for traits such as diseases  
61 resistance [12,18–20]. For diploid potatoes, the search for sources of resistance to late blight through  
62 GWAS has been relatively scarce. Two candidate genes and three SNPs associated with quantitative  
63 resistance to late blight in the Group Phureja were identified using 371 SNP distributed along the  
64 genome [18,21].

65 In the polygenic resistance one of the major limitations is the characterization of the plant-pathogen  
66 interaction due to many influencing factors, including the biology, genetics and evolution of the

67 pathogen in addition to the environmental conditions [22]. To facilitate the understanding of polygenic  
68 resistance, it has been proposed to subdivide the behavior of the disease in the different affected organs  
69 of the plant [23].

70 Studies indicate that differences in organ-specific resistances are resulting in an increase of  
71 transcription levels, although there is also the possibility that organs develop hypersensitivity response  
72 (HR) [23–25].

73 The aim of the presented study is to identify QTL for resistance to late blight in landrace accessions *S.*  
74 *tuberosum* Group Phureja. We employed a GWAS using phenotypic data from the characterization of  
75 disease resistance conducted in two localities and genotyping data obtained from GBS and 2b-RAD  
76 approaches. Here, we report 16 organ-specific QTL for resistance to late blight in *S. tuberosum* Group  
77 Phureja. The analysis of DNA sequence corresponding to the QTL reveals 15 candidate defense genes  
78 that both, contribute to a better understanding of the genetic control of late blight resistance in diploid  
79 potato, and also could be used in the future in potato breeding programs.

80

## 81 **2. Materials and Methods**

82

### 83 **2.1. Plant material**

84 The association panel consists of 150 accessions of *S. tuberosum* Group Phureja from the Working  
85 Collection of the Potato Breeding Program at Universidad Nacional de Colombia. From them, 109 are  
86 landrace accessions belonging to the Colombian Core Collection (CCC). Five are Colombian  
87 commercial genotypes, denoted as commercial cultivars, Criolla Colombia (CrCol), Criolla Guaneña  
88 (CrGN), Criolla Latina (CrLSE1), Criolla Paisa (CrPSE1), and Criolla Galeras (CrGL). Four are  
89 diploid accessions from the *IPK Germplasm Bank of Germany* (Leibniz-Institut für Pflanzengenetik

90 und Kulturpflanzenforschung), which correspond to materials collected in Colombia, Peru and Bolivia  
91 by the International Potato Center (CIP). Three accessions are from a segregating F1 population  
92 derived from a cross between the susceptible parental 48A.3 and the resistant parental 2A4, that exhibit  
93 different levels of resistance to *P. infestans*, and 20 are a new set of landrace accessions (CA) that were  
94 collected in Nariño province, located at south of Colombia, in 2013. The cultivars ICA Unica and  
95 Diacol Capiro were the resistant and the susceptible controls to late blight, respectively.

96 Each accession was multiplied vegetatively, late blight-free, using seed potato tubers at the  
97 experimental station, Centro Agropecuario Marengo of Universidad Nacional de Colombia, with an  
98 altitude of 2,516 meters above sea level (masl), annual average temperature of 13.7 °C, and cumulated  
99 rainfall of 669.9 mm/year. The production of seeds was carried out during three consecutive crop cycles  
100 under the Colombia traditional conditions of potato crop [26].

101

## 102 **2.2. Genotyping approaches**

103

104 GBS libraries were prepared and analyzed at the Génome Québec Innovation Centre from McGill  
105 University, while the 2b-RAD was conducted at the Agriculture and Agri-Food Canada (AAFC). The  
106 *PstI/MspI* enzymes were used for GBS digestion and the selective amplification was performed  
107 according to [27]. The *AflI* enzyme was used for 2b-RAD approach. The DNA fragments generated  
108 were sequenced using the MiSeq system from Illumina®.

109 DNA sequencing raw data from GBS and 2b-RAD were analyzed for SNP polymorphisms detection,  
110 according to the NGSTools Eclipse Plugin (NGSEP) [28]. The SNP calling was performed by

111 alignments to the current potato reference genome from *S. tuberosum* Group Phureja clone DM1-3  
112 (v4.03) [29], in order to obtain an annotated SNP matrix.

113 The filters applied to the annotated SNP matrix allowed to select those SNPs with quality score higher  
114 than 40 (-q 40), 0.05 Minor Allele Frequency (MAF), minimum distance of 5 bp between variants, and  
115 SNPs located in non-repetitive regions according to the RepeatMasker annotated repeats [29]. Then,  
116 the SNP matrix was filtered using SAS® software (SAS institute Inc.). The criteria such as a MAF  
117 higher than 0.05 and less than 10% of distorted molecular markers were allowed and those SNPs with  
118 Mendelian segregation of 1:1 were selected.

119

120

121

### 122 **2.3. Evaluation of potato response to late blight disease**

123

124 The evaluation of the response of the association panel to late blight was carried out in two localities  
125 during different crop cycles, starting in May 2010 until July 2014. The combination of localities and  
126 the crop cycles conformed seven environments, with specific conditions, that were coded ENV1 to  
127 ENV7 (Table 1). The localities were, La Unión in Antioquia, (5°58'22"N 75°21'40"O) and  
128 Subachoque, in Cundinamarca (4° 55' 41" N, 74° 10' 25" W). These localities were selected as  
129 important potato production regions in Colombia, and have a high natural inoculum pressure of *P.*  
130 *infestans*. The experimental design used for the phenotypic evaluation consisted of an incomplete block  
131 design with three biological replicates (plant clones) per genotype, distributed in blocks of 12  
132 experimental units of three tubers. The controls for resistance and susceptibility were the cultivars Ica

133 Unica and Diacol Capiro, respectively [30]. The plants were evaluated for their response to *P. infestans*  
 134 under natural infection conditions and inoculum pressure of RG57 (EC-1 clonal lineage), mating type  
 135 A1, which is the predominant pathogen presented in both localities [31].

136

137 **Table 1. Description of each environment for the phenotyping evaluation for resistance to *Phytophthora infestans* in**  
 138 **Group Phureja.** It is shown the name of location, the crop season, mean temperatures, mean relative humidity (RH), mean  
 139 precipitation and code.

| Location                  | Crop season                   | Temp. (C°) <sup>a</sup> | RH (%) <sup>a</sup> | Mean precipitation (mm/crop season) <sup>a</sup> | Code  |
|---------------------------|-------------------------------|-------------------------|---------------------|--------------------------------------------------|-------|
| La Unión (Antioquia)      | May 2010 – August 2010        | 15.1                    | 86.6                | 16.5                                             | ENV1* |
| La Unión (Antioquia)      | November 2010 – February 2011 | 14.2                    | 88.6                | 8.5                                              | ENV2* |
| La Unión (Antioquia)      | February 2013 - May 2013      | 14.8                    | 89.1                | 9.4                                              | ENV3  |
| La Unión (Antioquia)      | March 2014 - July 2014        | 13.6                    | 93.4                | 4.4                                              | ENV4  |
| Subachoque (Cundinamarca) | May 2010 – August 2010        | 14.4                    | 86.3                | 4.4                                              | ENV5* |
| Subachoque (Cundinamarca) | December 2010- April 2011     | 13.3                    | 85.7                | 2.6                                              | ENV6* |
| Subachoque (Cundinamarca) | November 2013 - February 2014 | 13.1                    | 80.0                | 2.6                                              | ENV7  |

140 <sup>a</sup> Average of environmental parameters (IDEAM [www.ideam.gov.co](http://www.ideam.gov.co)).

141 \* Data from [18]

142

143 The severity of late blight was estimated and scored according to the Percentage of Direct Visual  
144 Estimation of the disease (PDVE) [32] in leaves and stems following the concepts presented by Bock  
145 et al., [34] and the procedure described by Álvarez et al., [18]. The evaluations were conducted by  
146 expert raters in late blight, who made the estimations along the experiments. The diseased leaves and  
147 stems were assessed independently per each plant and for each organ. The severity was estimated as  
148 the percentage of the affected area for leaves and stems through a visual direct estimation. For stems,  
149 the PDVE was averaged over the number of stems of each genotype. The evaluation started 40 days  
150 post sowing (dps) and were performed weekly until the susceptible control was completely affected  
151 (PDVE = 100%). Disease progress in time for each plant was analyzed by estimating the Area Under  
152 Disease Progress Curve (AUDPC) and the Relative Area Under Disease Progress Curve (rAUDPC) to  
153 the total area [33,35]. The rAUDPC value for each genotype per environment was calculated by using  
154 the PROCMEAN procedure of SAS®.

155 In order to evaluate the resistance response of the Phureja genotypes to late blight infection, previous  
156 data of the resistance in leaves in the population were taken into account. These data correspond to the  
157 phenotypic evaluation of late blight response of 104 diploid accessions of the Group Phureja (CCC),  
158 in the same two localities from May 2010 to February 2011 (ENV1, ENV2, ENV5, and ENV6) [18]  
159 (Table 1) and these evaluations were integrated for the analysis with new evaluations for the same plant  
160 material conducted from February 2013 until July 2014 (ENV3, ENV4, and ENV7).

161

#### 162 **2.4. Analysis of genetic stability**

163

164 The GGE-biplot criteria were centered by two (centered G + GE), without scaling and singular value  
165 partitioning (SVP). GGE-biplot analysis was performed using the R package GEA-R [36].



166

167

## 168 **2.5. Statistical analysis**

169

170 The rAUDPC values were tested for variance components of genotype, genotype by environment, and  
171 experimental error through an ANOVA (SI 1). All analyses were performed using the SAS® software.  
172 AUDPC data for the trials of late blight resistance evaluation of the CCC population were included for  
173 best linear unbiased predictors (BLUPs) estimation and association analysis. These data correspond to  
174 the phenotypic evaluation of late blight disease response of 104 diploid accessions of the Group Phureja  
175 CCC, at La Unión from May to August 2010, from May to August 2010 at Subachoque, from  
176 November 2010 to February 2011 at La Unión, and from December 2010 to April 2011 at Subachoque  
177 [18] (Table 1).

178

## 179 **2.6. Genome-wide association study for late blight resistance**

180

181 GWAS was performed for marker main and marker by locality interaction effects simultaneously using  
182 a liner mixed model in PROC MIXED procedure in SAS® program (SAS version 9.2) following the  
183 model:

$$184 \quad Y_{ijk} = \mu + M_i + T_j + M_i * T_j + e_{ijk}$$

185 Where  $Y_{ijk}$  is the phenotypic value;  $\mu$  is the general mean;  $M_i$  is the random effect of i-th marker  
186 genotype;  $T_j$  is the locality effect fixed of j-th locality;  $M_i * T_j$  is the interaction random effect of i-th

187 marker with  $j$ -th local; and  $e_{ijk}$  is the residual. To determine traits of interest in the genome wide  
188 detection analysis, a log-of-odds (LOD) threshold with P-value  $\leq 0.00001$ , and 1000 permutations was  
189 determined. The QTL model comprises an iterative multiloci procedure. Therefore, the most  
190 informative SNP (QTL) was set as a fixed factor during each calculation iteration step. All remaining  
191 markers were again incorporated in the next iteration round and re-analyzed. The starting point of each  
192 calculation round was determined by the result of the previous iteration. P-values of significant markers  
193 were corrected using Probability of False Discovery Rate (PFDR) of lower than 0.05, implemented in  
194 the SAS procedure PROC MULTTEST according to Benjamini and Yekutieli [37]. This procedure  
195 was repeated until no marker could be detected, which led to a reduction in significant markers and  
196 thereby a reduced number of false-positive QTL. A confidence interval of 1000 bp was chosen on both  
197 sides of the most significant SNP and designated as putative QTL. SNPs were combined to one joint  
198 QTL depending on their estimated (significant) P-value from the first iteration of the multi loci  
199 procedure. Therefore, the size of the genetic interval was dependent on the significance value of  
200 flanking SNPs.

201 The phylogenetic relationships of the 150 potato genotypes were determined based on the allele  
202 frequency of each SNP, the genotypes were assigned to an eventual population, using a Bayesian  
203 modeling in the software STRUCTURE v.2.3 [38]. The population structure matrix was used as the  
204 matrix Q in the association model.

205

## 206 **2.7. QTL mapping and candidate gene proposed**

207

208 The DNA sequences harboring SNPs identified as statistically associated with the phenotypic data of  
209 the response to late blight were explored through BLAST (Basic Local Alignment Search Tool)

210 analysis to the current potato reference genome (v4.04). These sequences were searched also in the  
211 potato consensus QTL map [39] in order to find co-localizations of SNPs with previous reported QTL.

212

### 213 **3. Results**

214

#### 215 **3.1. GBS and 2b-RAD genotyping in *Solanum tuberosum* Group Phureja**

216

217 Plant genome-wide genotyping for single nucleotide polymorphism (SNP) detection was performed  
218 by GBS [40] and 2b-RAD [41] approaches, using Illumina Hi-seq (Illumina, Inc.), which produced  
219 both in total 349,965,885 reads. Using GBS were obtained 302,965,885 reads of 90 bp, while with 2b-  
220 RAD 46,502,388 reads of 36 bp. On average, 88% of the reads, were aligned to unique positions in  
221 the potato reference genome (v4.04) [29]. Based NGSEP analyses a total of 87,656 SNPs were  
222 identified. From them, 85,755 SNPs were obtained from GBS and 1,901 from 2b-RAD. Finally, the  
223 subsequent filtering criteria reduced the matrix to 83,862 SNPs. These SNPs are distributed across of  
224 the 12 potato chromosomes with an average of 6,988 for each chromosome. The higher densities of  
225 SNPs were found in chromosomes I, III, and IV with 10,427; 8,237 and 8,160 SNPs, respectively  
226 (Figure 1). From the resulting matrix of 83,862 SNPs, 60% (49,948) corresponds to transitions while  
227 40% (33,914) are transversions, with a ratio of 1.47 (SI 2).

228

229 **Figure 1. Number of SNPs mapped for each chromosome in the potato genome.** Numbers on the  
230 right of bars show the total SNPs identified through GBS and 2b-RAD located in each chromosome as  
231 indicated by roman letters on y-axis.

232

233

234 **3.2. Evaluation of late blight response in an association panel of Group Phureja**

235

236 Both AUDPC and rAUDPC values for the genotypes for each locality and season showed a continuous  
237 distribution. The AUDPC values observed among the genotypes were the highest in the ENV6 (ranged  
238 from 1,400 to 13,325), followed by ENV5 (from 503.5 to 11,964.2) and then, by ENV2 (from 1,416.6  
239 to 10,227.7). In the Table 2, it is shown the number of evaluated genotypes, the AUDPC and rAUDPC  
240 ranges.

241

242 **Table 2. Distribution of the AUDPC and rAUDPC values in the Group Phureja association panel.** Number of  
243 genotypes evaluated, range of AUDPC and rAUDPC values.

| Location/code | Evaluated genotypes | AUDPC range      | rAUDPC range |
|---------------|---------------------|------------------|--------------|
| ENV1          | 112                 | 437.5 – 12,835   | 0 – 3.67     |
| ENV2          | 112                 | 1416.6 – 10227.7 | 0.28 – 2.08  |
| ENV3          | 111                 | 0 – 1456.6       | 0 – 0.46     |
| ENV4          | 114                 | 0 – 834.1        | 0 – 0.23     |
| ENV5          | 112                 | 503.5 – 11964.2  | 0.07 – 1.89  |
| ENV6          | 112                 | 1,400 – 13,325   | 0.25 – 2.37  |
| ENV7          | 137                 | 4.16 – 1713.4    | 0 – 0.40     |

244

### 245 3.3. Stability analysis

246

247 With the purpose of evaluate the performance of Phureja genotypes under different environments; a  
248 genotype x environment analysis was conducted through a GGE-biplot analysis of Multi-Environment  
249 Trials (MET). The rAUDPC values of each genotype in each plant organ (leaves and stems) were  
250 analyzed independently. The GGE-Biplot analysis shows that the two principal components explained  
251 77.5% and 91.1% of the total variance caused by  $G_{\text{plant}} + G_{\text{pathogen}} + E$  for Phureja resistance to late  
252 blight in leaves and stem, respectively (Table 3 and Figure 2). The leaves analysis showed the two  
253 mega-environments conformation, MET 1 (ENV1, ENV2, ENV5, and ENV6) and MET 2 (ENV3,  
254 ENV4 and ENV7). But for stem analysis no mega-environments were detected. The rAUDPC values  
255 of the genotypes were able to discriminate among seven environments tested. The behavior of  
256 genotypes for both leaves and stem fall into two sectors of the graphic. For leaves resistance, the  
257 genotypes behavior seems to be quite similar in MET 1, where, the genotypes exhibit more  
258 susceptibility in the environment ENV1. In MET 2, the environments ENV3 and ENV4 show also the  
259 most susceptible genotypes (Figure 2).

260

261 **Figure 2. Which Won Where/What graphic of GGE-Biplot analysis for leaves and stem**  
262 **resistance evaluation.** (a) GGE-Biplot analysis for phenotype evaluation against *P. infestans* in leaves.  
263 (b) GGE-Biplot analysis for phenotype evaluation against *P. infestans* in stem. ENV codes are shown  
264 in table 1.

265

266 **Table 3. Summary of genome associations for resistance to late blight by location.** Plant organ, localization, genome  
267 position, QTL for late blight resistance, its significance and gene annotation were the QTL resides.

| Plant organ | Location                  | Genome position     | QTL name  | P-value     | R <sup>2</sup> | Gen annotation (Arabidopsis and Tomato)                    |
|-------------|---------------------------|---------------------|-----------|-------------|----------------|------------------------------------------------------------|
| Leaves      | Subachoque (Cundinamarca) | Chr 1 Pos 37547438  | RPiLSub1  | 6,2616E-08  | 18.8%          | Protein Glycoside hydrolase, catalytic domain              |
|             |                           | Chr 3 Pos 54281967  | RPiLSub3  | 9,0818E-09  | 25.1%          | Chloroplast protein with Zinc finger domain                |
|             |                           | Chr 6 Pos 40366150  | RPiLSub6  | 2,5174E-06  | 16.3%          | Integral membrane transporter family protein               |
|             | La Unión (Antioquia)      | Chr 3 Pos 3162604   | RPiLLU3a  | 9,15844E-11 | 28.5%          | Ubiquitin receptor protein associated with PEX2 and PEX12. |
|             |                           | Chr 3 Pos 54281967  | RPiLLU3b  | 4,49269E-09 | 24.3%          | Chloroplast protein with Zinc finger domain                |
|             |                           | Chr 11 Pos 7171775  | RPiLLU11  | 8,99280E-06 | 13.7%          | Receptor-like protein kinase                               |
| Stem        | Subachoque (Cundinamarca) | Chr4 Pos 9090691    | RPiSSub4  | 2,04E-06    | 17.3%          | Leucine-rich repeat protein kinase family protein          |
|             |                           | Chr 6 Pos 11035921  | RPiSSub6  | 1,14E-09    | 25.8%          | SIT4 phosphatase-associated family protein                 |
|             |                           | Chr 7 Pos 53724116  | RPiSSub7  | 1,07E-09    | 25.8%          | Actin filament-based movement. Endocytosis                 |
|             |                           | Chr 10 Pos 51118650 | RPiSSub10 | 1,02E-07    | 20.8%          | DHHC-type zinc finger family protein                       |
|             |                           | Chr 12 Pos 57373550 | RPiSSub12 | 1,27E-08    | 23.2%          | No functional annotation                                   |
|             | La Unión (Antioquia)      | Chr 5 Pos 45069210  | RPiSLU5   | 3,00E-08    | 22.2%          | Ser/Thr protein kinase, BLUS1                              |
|             |                           | Chr 10 Pos 4646061  | RPiSLU10  | 3,53E-11    | 27.7%          | No functional annotation                                   |

|  |  |                     |           |          |       |                                                  |
|--|--|---------------------|-----------|----------|-------|--------------------------------------------------|
|  |  | Chr 12 Pos 3076623  | RPiSLU12a | 1,60E-14 | 33.3% | Serine/threonine-protein kinase. Plasma membrane |
|  |  | Chr 12 Pos 38707075 | RPiSLU12b | 7,64E-23 | 50.9% | No functional annotation                         |
|  |  | Chr 12 Pos 56839213 | RPiSLU12c | 6,32E-18 | 38.4% | No functional annotation                         |

268

269

270 On the other hand, the genotypes CCC003 (32) and CCC101 (103) were identified as extreme resistant  
271 and susceptible to late blight, respectively evaluated in leaves, while the genotypes CCC086 (91) and  
272 CC133 (131) were identified in stem as extreme resistant and susceptible, respectively. The numbers  
273 in the parentheses are the running ones as shown in the Figure 2. According to the rAUDPC, 44  
274 genotypes are resistant in the stem evaluation. For leaves, five genotypes CCC003 (32), CCC051 (68),  
275 CCC005 (34), CCC115 (114), and the control Unica (233) were the most resistant.

276

### 277 **3.4. Stable QTL identified for late blight resistance in leaves and stem**

278

279 In total 16 organ-specific QTL distributed in nine of the 12 chromosomes were identified (Table 3 and  
280 Figure 3). The QTL detected explain from 13.7% to 50.9% of the phenotypic variance (late blight  
281 resistance) (Table 3). Six QTL were detected through the leaves evaluation, three under locality  
282 Subachoque and the other three for the locality La Unión. Two of these QTL were considered as stable  
283 as they were detected in the same organ (leaves) in the two localities, RPiLSub3 and RPiLLU3b for  
284 Subachoque and La Union, respectively. The QTL RPiLSub3 explains 25.1% while the QTL  
285 RPiLLU3b explains the 24.3% of the resistance to *P. infestans* (Table 3). On the other hand, ten QTL

286 were detected for late blight stem resistance. Five QTL were detected in Subachoque locality and the  
287 other five in La Unión. The QTL coded as RPiSLU12b explains the highest phenotypic variance of  
288 50.9% identified through the stem evaluation.

289

290 **Figure 3. SNPs mapped in the potato chromosomes of Group Phureja.** Genomic distances are  
291 given in Mbp according to the PGSC V4.03 pseudomolecules [29]. In red are presented the QTL for  
292 late blight resistance detected in the phenotypic response for leaves, while in blue are presented those  
293 detected for stems. In black are presented the markers that limit each chromosome in the potato  
294 genome. Diagram plotted using MapChart software [41].

295

### 296 3.5. QTL and candidate genes for organ-specific resistance to late blight

297

298 The DNA genome sequences harboring associated SNPs to late blight resistance were analyzed *in*  
299 *silico* using BLAST against the current potato reference genome (v4.04) and to the potato consensus  
300 QTL map [29]. Those genes which co-localized with the SNPs associated to late blight resistance were  
301 considered as candidate genes for late blight resistance. In total, 15 candidate genes were identified, ten  
302 for stem resistance and five for leaves resistance. Among the total of candidate genes, those  
303 corresponding to the QTL RPiSSub12, RPiSLU10, RPiSLU12b, and RPiSLU12c have not been  
304 previously annotated, while the other 11 candidate genes, have known functional annotation in the  
305 current potato genome, with diverse protein domains (Table 3). Interestingly, the QTL RPiSSub4,  
306 which explains 17.3% of the resistance to late blight in stem, co-localized with a gene coding for a  
307 leucine-rich repeat containing protein kinase, a class of genes shown to be involved in plant immunity.



308

#### 309 **4. Discussion**

310

311 We identified 16 organ-specific QTL for resistance to *P. infestans* and 15 candidate genes that might  
312 have a putative function in the defense response of potato against this pathogen. For that an association  
313 panel of 150 accessions from *S. tuberosum* Group Phureja was evaluated under seven environments  
314 conditions and genotyped through GBS and 2b-RAD. The locations chosen for the phenotypic  
315 evaluation to late blight organ-specific disease response (La Unión-Antioquia and Subachoque-  
316 Cundinamarca) are important potato production regions in Colombia with high natural pathogen  
317 pressure. Moreover, these are geographic regions where the late blight disease response in the Group  
318 Phureja has been evaluated before and the *P. infestans* populations in these regions have been explored  
319 [43]. Nevertheless, it will be interesting to explore the actual genetic diversity of the *P. infestans*  
320 populations in these two locations, in order to elucidate connections between this variability and the  
321 variability found both in the defense response of the evaluated genotypes and also in the identified  
322 QTL. Furthermore, this will let directing the potato breeding programs toward the development of  
323 resistant adapted materials for these important potato production regions.

324 In the genetic stability analysis, the addition of the phenotypic data (ENV1, ENV2, ENV5, and ENV6)  
325 shows a major variation of the resistance behavior in the genotypes and revealed the presence of Meta  
326 Environments. In the phenotypic evaluation of stems, the genotypes behavior was less dissimilar with  
327 a clear resistance trend. On the other hand, in the leaves phenotypic evaluation, the MET 1 (Figure 3)  
328 grouped the phenotypic data, which were obtained when the climate phenomenon called La Niña  
329 affected Colombia, and in consequence those crop cycles presented higher relative humidity than MET  
330 2. While in the MET 2 those environments considered as normal years with an average relative

331 humidity were grouped. Therefore, as previously reported, the environments with higher relative  
332 humidity seem to be the most favorable for the late blight disease development [5,44].

333 In this study 16 organ-specific QTL conferring resistance in potato Group Phureja against *P. infestans*  
334 were identified, explaining high levels of phenotypic variance or late blight resistance (13.7% to  
335 50.9%) thus these regions could be considered as QTL with major effects [45]. Ten of these QTL were  
336 detected through the stem evaluation while the other six QTL were detected through the leaves  
337 evaluation. Despite that it is known that the response in a plant to a pathogen can be organ specific  
338 [24], according to our understanding this is the first organ-specific late blight resistance QTL detection  
339 study through the phenotyping in leaves and stem from *S. tuberosum* Group Phureja.

340 The organ specific analyses have been considered as a useful way to dissect and understand the plant  
341 pathogen polygenic resistance. Detection of organ-specific pathogen resistance QTL has already been  
342 published in several crops such as maize (*Zea mays*) [46], tetraploid potato [23–25] and wheat [47].  
343 The resistance responses in different plant organs have been associated with the ability and speed of  
344 defense related metabolites production, as well as how these metabolites can be transported to other  
345 plant organs and then increase the plant pathogen basal defense. Dannan et al., [23] report that one of  
346 the advantages of the high level of resistance to late blight exhibited by the potato stem compared to  
347 the leaves, is the ability of the stem to recover the plant leaves and thus could have a significant  
348 potential in controlling late blight epidemics in the field.

349 Several resistance QTL to late blight have been reported in *S. tuberosum* Group Phureja [4,48,49],  
350 however, none of those QTL were identified in this study. This could be explained by the high effect  
351 of the environments where the phenotypic evaluations were performed. Also, the plant materials  
352 employed, their genetic backgrounds, and the phenotyping restricted to specific plant organ could have  
353 an important influence in the QTL detection. Nevertheless, we are reporting a stable QTL, which

354 receives its name according to the locality in which it was detected, RPiLSub3 and RPiLLU3b, in  
355 Subachoque and La Unión conditions respectively. In Subachoque this QTL explains 25.1% while in  
356 La Unión explains the 24.3% of the resistance to *P. infestans*. The phenotypic variance explained by a  
357 QTL could change depending on the environment where the phenotypic data were collected and also  
358 by the evaluated organ. This variability has been reported in QTL for maize [50], barley [51], and  
359 *Brassica rapa* [52].

360 The genome regions harboring the SNPs associated with resistance to late blight harbor genes coding  
361 for proteins carrying diverse domains and were established as candidate genes for resistance to late  
362 blight. We propose 15 candidate genes, four of them have not functional annotation so far.  
363 Interestingly, two of these anonymous QTL, are those explaining the highest percentage of phenotypic  
364 variances, RPiSLU12c and RPiSLU12b, which explain 38.4% and 50.9% of the resistance to late  
365 blight, respectively. These genomic regions have a big potential to be explored in the near future for  
366 functional validation and establish their annotation.

367 Both qualitative and quantitative resistance have been described in the *S. tuberosum* - *P. infestans*  
368 interaction [6,18,46,53]. Thus, it is not surprising that within the set of candidate genes was found a  
369 gene coding for a leucine-rich repeat protein kinase family, a protein typically related to qualitative  
370 resistance, co-localizing with the RPiSSub4 QTL. This finding reinforces the thesis that the qualitative  
371 resistance governed by the Avr-R interactions and the quantitative resistance governed by QTL can act  
372 simultaneously. On the other hand, the fact that the majority of the identified candidate genes do not  
373 belong to classical protein domains of resistance genes, goes accordingly to previous findings where it  
374 has been shown that the proteins carrying the classical resistance domains could be just a few of the  
375 whole set of proteins that governs the quantitative resistance [22].

376 Here four candidate genes coding for protein kinases were identified co-localizing with the QTL  
377 RPiLLU11, RPiSSub4, RPiSLU5, and RPiSLU12a. The role of kinases has broadly described in plant  
378 resistance [54–55]. Their roles have been described as a receptor molecule and also involved in the  
379 defense signaling pathway [58]. In *S. tuberosum* some protein kinases have been reported such as  
380 calcium-dependent protein kinases (CDPKs) decode calcium ( $\text{Ca}^{2+}$ ) signals and activate different  
381 signaling pathways involved in hormone signaling and both abiotic and biotic stress responses [59]. In  
382 this study, the authors identified different organ-specific expression levels among the genes *CDPKs*.  
383 The higher expression of these genes was in roots, stolons, and microtubers compared with the level  
384 in leaves and stems (i.e. StCDPK7). Also, the potato CDPKs can be sorted into two classes, those  
385 which are ubiquitously expressed in different tissues and those that have specific expression pattern  
386 which are approximately one-third of the CDPK family [59].

387 The results presented here demonstrate the great potential of the Group Phureja as an alternative source  
388 of resistance to potato late blight. In fact, the diploid nature of this group facilitates its use in molecular  
389 breeding programs, whose aim is the transferring of resistance into tetraploid potatoes gene pool. This  
390 article shows that the responses of potato plants to *P. infestans* infection are organ-specific. These  
391 differential responses can have an important impact on the behavior of the genotype and therefore on  
392 its production. Therefore, these results open the door to continue exploring this type of resistance, so  
393 in the near future we can develop strategies that integrate the specific responses in the potato  
394 improvement and production programs.

395 It is known that the dynamics with which effectors and *R* genes interact in resistant potato genotypes  
396 versus susceptible genotypes differ in the level of transcription, as well as in the speed with which it is  
397 induced in tuber [25] and in leaves [60]. Now, our results open the way for studies of expression  
398 demonstrating the above in potato leaves of the Group Phureja and for the first time in potato stem.

399 The identified QTL in this research are an advance in the discovery of new organ-specific genetic  
400 factors involved in the resistance response of *S. tuberosum* Group Phureja to *P. infestans* infection.  
401 Also, the genomic regions associated and the candidate genes proposed are resistance sources to be  
402 functionally validated in the near future. The environment specific QTL here described hides  
403 interesting molecular mechanisms to be explored to a better understanding the genotype-environment  
404 interactions in the potato - *P. infestans* interaction. Finally, the results could be integrated into potato  
405 genetic breeding programs focused on marker assisted selection, as well as, for the development  
406 of local adapted new cultivars or by combining or pyramiding these QTL to develop environment  
407 independent resistant cultivars.

408

#### 409 **5. Conflict of Interest Statement**

410 The authors declare that the research was conducted in the absence of any commercial or financial  
411 relationships that could be construed as a potential conflict of interest. The authors declare no conflict  
412 of interest.

413

#### 414 **6. Author's contributions**

415 DJ: Designed and established the experiments, took the data, analyzed the results, prepared the draft  
416 of manuscript. JS: Revised and analyzed the results, prepared the draft of manuscript. AB: Contributed  
417 with conceptualization of the original idea, revised the results, analyzed the results, revised the draft of  
418 manuscript. JL: Revised and analyzed the results, revised the draft of manuscript. TM: Conceptualized  
419 the original idea, supervised the whole research, designed the experiments, revised the results and  
420 analyses and revised the manuscript.

421

## 422 **7. Funding**

423 This research was funded by the International Development Research Centre (IDRC) and Global affairs  
424 Canada through the Canadian International Food Security Research Fund (CIFSRF) that funded the  
425 project SAN Nariño number 108125-002, and the “Departamento Administrativo de Ciencia,  
426 Tecnología e Innovación” COLCIENCIAS for funding the Project 110171250437 and the PhD  
427 scholarship call 727-2015.

428

429

## 430 **8. Acknowledgments**

431 We are grateful to Dr. Klaus Dehmer for supporting this work with plant material consisting in diploid  
432 accessions from the *IPK Germplasm Bank of Germany* (Leibniz-Institut für Pflanzengenetik und  
433 Kulturpflanzenforschung. We would like to thank to Jorge Duitama from “Universidad de los Andes”  
434 for the bioinformatics support; to Diana Duarte, Boby Mathew, and Said Dadshani from INRES  
435 Institute of University of Bonn for their scientific support and to María Cecilia Delgado for her  
436 collaboration in the establishment of the experiments in field conditions.

437

## 438 **9. Supporting information captions**

439 **SI 1.** a. Analysis of variance for genotype, environment and genotype x environment among the  
440 association panel for a. leaves phenotyping. b. stem phenotyping ( $p < 0.001$ ).

441 **SI 2.** Transitions and transversion SNPs from the genotyping matrix of 83,862 SNPs.

442 **SI 3.** rAUDPC values by genotype for leaves and stem resistance evaluations.

443 **SI 4.** GBS and 2b-RAD genotyping data.

444

445 **Conflict of Interest Statement:** The authors declare that the research was conducted in the absence of  
446 any commercial or financial relationships that could be construed as a potential conflict of interest.

447

## 448 **10. Data Availability Statement**

449 The genotyping data supporting the conclusions of this manuscript is available in SI 4.

450

## 451 **11. References**

- 452 1. FAOSTAT. FAOSTAT. In: FAOSTAT [Internet]. 2018 [cited 19 Oct 2018]. Available:  
453 <http://www.fao.org/faostat/en/#home>
- 454 2. Spooner DM, Núñez J, Trujillo G, Herrera M del R, Guzmán F, Ghislain M. Extensive simple  
455 sequence repeat genotyping of potato landraces supports a major reevaluation of their gene pool  
456 structure and classification. *PNAS*. 2007;104: 19398–19403. doi:10.1073/pnas.0709796104
- 457 3. Ghislain M, Andrade D, Rodríguez F, Hijmans RJ, Spooner DM. Genetic analysis of the  
458 cultivated potato *Solanum tuberosum* L. Phureja Group using RAPDs and nuclear SSRs. *Theor*  
459 *Appl Genet*. 2006;113: 1515–1527. doi:10.1007/s00122-006-0399-7
- 460 4. The Potato Genome Sequencing Consortium. Genome sequence and analysis of the tuber crop  
461 potato. *Nature*. 2011;475: 189–195. doi:10.1038/nature10158
- 462 5. Nowicki M, Foolad MR, Nowakowska M, Kozik EU. Potato and Tomato Late Blight Caused by  
463 *Phytophthora infestans*: An Overview of Pathology and Resistance Breeding. *Plant Disease*.  
464 2011;96: 4–17. doi:10.1094/PDIS-05-11-0458

- 465 6. Mosquera T, Alvarez MF, Jiménez-Gómez JM, Muktar MS, Paulo MJ, Steinemann S, et al.  
466 Targeted and Untargeted Approaches Unravel Novel Candidate Genes and Diagnostic SNPs for  
467 Quantitative Resistance of the Potato (*Solanum tuberosum* L.) to *Phytophthora infestans*  
468 Causing the Late Blight Disease. Yin T, editor. PLOS ONE. 2016;11: e0156254.  
469 doi:10.1371/journal.pone.0156254
- 470 7. Ballvora A, Ercolano MR, Weiss J, Meksem K, Bormann CA, Oberhagemann P, et al. The R1  
471 gene for potato resistance to late blight (*Phytophthora infestans*) belongs to the leucine  
472 zipper/NBS/LRR class of plant resistance genes. *Plant J.* 2002;30: 361–371.
- 473 8. Leonards-Schippers C, Gieffers W, Schäfer-Pregl R, Ritter E, Knapp SJ, Salamini F, et al.  
474 Quantitative resistance to *Phytophthora infestans* in potato: a case study for QTL mapping in an  
475 allogamous plant species. *Genetics.* 1994;137: 67–77.
- 476 9. Centre for Agriculture and Biosciences International. CABI.org [Internet]. 2018 [cited 19 Oct  
477 2018]. Available: <https://www.cabi.org/>
- 478 10. Ballvora A, Jöcker A, Viehöver P, Ishihara H, Paal J, Meksem K, et al. Comparative sequence  
479 analysis of *Solanum* and *Arabidopsis* in a hot spot for pathogen resistance on potato  
480 chromosome V reveals a patchwork of conserved and rapidly evolving genome segments. *BMC*  
481 *Genomics.* 2007;8: 112. doi:10.1186/1471-2164-8-112
- 482 11. Fry WE, Birch PRJ, Judelson HS, Grünwald NJ, Danies G, Everts KL, et al. Five Reasons to  
483 Consider *Phytophthora infestans* a Reemerging Pathogen. *Phytopathology.* 2015;105: 966–981.  
484 doi:10.1094/PHYTO-01-15-0005-FI
- 485 12. Pajeroska-Mukhtar K, Stich B, Achenbach U, Ballvora A, Lübeck J, Strahwald J, et al. Single  
486 Nucleotide Polymorphisms in the Allene Oxide Synthase 2 Gene Are Associated With Field  
487 Resistance to Late Blight in Populations of Tetraploid Potato Cultivars. *Genetics.* 2009;181:  
488 1115–1127. doi:10.1534/genetics.108.094268
- 489 13. Gebhardt C, Valkonen JPT. Organization of Genes Controlling Disease Resistance in the Potato  
490 Genome. *Annual Review of Phytopathology.* 2001;39: 79–102.  
491 doi:10.1146/annurev.phyto.39.1.79
- 492 14. Haverkort AJ, Struik PC, Visser RGF, Jacobsen E. Applied Biotechnology to Combat Late  
493 Blight in Potato Caused by *Phytophthora Infestans*. *Potato Research.* 2009;52: 249–264.  
494 doi:10.1007/s11540-009-9136-3
- 495 15. Jansky SH, Spooner DM. The Evolution of Potato Breeding. *Plant Breeding Reviews.* Wiley-  
496 Blackwell; 2018. pp. 169–214. doi:10.1002/9781119414735.ch4
- 497 16. Torres L, Cuesta X, Monteros C, Rivadeneira J. Variedades. In: International Potato Center  
498 [Internet]. 2011 [cited 2 Mar 2014]. Available: [http://cipotato.org/region-](http://cipotato.org/region-quito/informacion/inventario-de-tecnologias/variedades/)  
499 [quito/informacion/inventario-de-tecnologias/variedades/](http://cipotato.org/region-quito/informacion/inventario-de-tecnologias/variedades/)
- 500 17. Barquero M, Gómez L, Brenes A. Resistencia al tizón tardío (*Phytophthora infestans*) en clones  
501 promisorios de papa en Costa Rica. *Agronomía Costarricense.* 2005;29: 31–45.



- 502 18. Álvarez MF, Angarita M, Delgado MC, García C, Jiménez-Gomez J, Gebhardt C, et al.  
503 Identification of Novel Associations of Candidate Genes with Resistance to Late Blight in  
504 *Solanum tuberosum* Group Phureja. *Front Plant Sci.* 2017;8: 1040. doi:10.3389/fpls.2017.01040
- 505 19. Gebhardt C, Ballvora A, Walkemeier B, Oberhagemann P, Schüler K. Assessing genetic  
506 potential in germplasm collections of crop plants by marker-trait association: a case study for  
507 potatoes with quantitative variation of resistance to late blight and maturity type. *Molecular*  
508 *Breeding.* 2004;13: 93–102. doi:10.1023/B:MOLB.0000012878.89855.df
- 509 20. Simko I. One potato, two potato: haplotype association mapping in autotetraploids. *Trends Plant*  
510 *Sci.* 2004;9: 441–448. doi:10.1016/j.tplants.2004.07.003
- 511 21. Visser MHPW, Keizer LCP, Van Eck HJ, Jacobsen E, Colon LT, Struik PC. Can the QTL for  
512 late blight resistance on potato chromosome 5 be attributed to foliage maturity type? *Theor*  
513 *Appl Genet.* 2003;106: 317–325. doi:10.1007/s00122-002-1021-2
- 514 22. Corwin JA, Kliebenstein DJ. Quantitative Resistance: More Than Just Perception of a Pathogen.  
515 *Plant Cell.* 2017;29: 655–665. doi:10.1105/tpc.16.00915
- 516 23. Danan S, Chauvin J-E, Caromel B, Moal J-D, Pellé R, Lefebvre V. Major-effect QTLs for stem  
517 and foliage resistance to late blight in the wild potato relatives *Solanum sparsipilum* and *S.*  
518 *spgazzinii* are mapped to chromosome X. *Theor Appl Genet.* 2009;119: 705–719.  
519 doi:10.1007/s00122-009-1081-7
- 520 24. Gao L, Bradeen JM. Contrasting Potato Foliage and Tuber Defense Mechanisms against the  
521 Late Blight Pathogen *Phytophthora infestans*. Wong S-M, editor. *PLOS ONE.* 2016;11:  
522 e0159969. doi:10.1371/journal.pone.0159969
- 523 25. Gao L, Tu Z, Millett BP, Bradeen JM. Insights into organ-specific pathogen defense responses  
524 in plants: RNA-seq analysis of potato tuber-*Phytophthora infestans* interactions. *BMC*  
525 *Genomics.* 2013;14: 340. doi:10.1186/1471-2164-14-340
- 526 26. Alarcón J, Torrado E, Nuñez P, Forigua V. Manejo fitosanitario del cultivo de la papa  
527 (*Solanum tuberosum* subsp. *andigena* y *S. phureja*). *Medidas para la temporada invernal.*  
528 *Produmedios;* 2011.
- 529 27. Sonah H, Bastien M, Iquira E, Tardivel A, Légaré G, Boyle B, et al. An Improved Genotyping  
530 by Sequencing (GBS) Approach Offering Increased Versatility and Efficiency of SNP  
531 Discovery and Genotyping. *PLoS ONE.* 2013;8: e54603. doi:10.1371/journal.pone.0054603
- 532 28. Duitama J, Quintero JC, Cruz DF, Quintero C, Hubmann G, Foulquié-Moreno MR, et al. An  
533 integrated framework for discovery and genotyping of genomic variants from high-throughput  
534 sequencing experiments. *Nucleic Acids Res.* 2014;42: e44. doi:10.1093/nar/gkt1381
- 535 29. Potato Genome Sequencing Consortium, Xu X, Pan S, Cheng S, Zhang B, Mu D, et al. Genome  
536 sequence and analysis of the tuber crop potato. *Nature.* 2011;475: 189–195.  
537 doi:10.1038/nature10158
- 538 30. Ñustez C. Variedades colombianas de papa. Grupo imágenes; 2011.

- 539 31. Vargas AM, Ocampo LMQ, Céspedes MC, Carreño N, González A, Rojas A, et al.  
540 Characterization of *Phytophthora infestans* Populations in Colombia: First Report of the A2  
541 Mating Type. *Phytopathology*. 2008;99: 82–88. doi:10.1094/PHYTO-99-1-0082
- 542 32. Nita M, Ellis MA, Madden LV. Reliability and accuracy of visual estimation of *Phomopsis* leaf  
543 blight of strawberry. *Phytopathology*. 2003; 93.8: 995-1005. doi:10.1094/PHYTO.2003.93.8.995.
- 544 33. Forbes G, Perez W, Andrade-Piedra J. Field assessment of resistance in potato to *Phytophthora*  
545 *infestans*: International cooperators guide. 2014. doi:10.4160/9789290604402
- 546 34. Bock CH, Poole GH, Parker PE, Gottwald TR. Plant Disease Severity Estimated Visually, by  
547 Digital Photography and Image Analysis, and by Hyperspectral Imaging. *Critical Reviews in*  
548 *Plant Sciences*. 2010;29: 59–107. doi:10.1080/07352681003617285
- 549 35. Campbell CL, Madden LV. *Introduction to Plant Disease Epidemiology*. 1 edition. New York:  
550 Wiley-Interscience; 1990.
- 551 36. Pacheco Á, Vargas M, Alvarado G, Rodríguez F, Crossa J, Burgueño J. GEA-R (Genotype x  
552 Environment Analysis with R for Windows) Version 4.1 [Internet]. 2018. Available:  
553 <https://data.cimmyt.org/dataset.xhtml?persistentId=hdl:11529/10203>
- 554 37. Benjamini Y, Yekutieli D. False Discovery Rate–Adjusted Multiple Confidence Intervals for  
555 Selected Parameters. *Journal of the American Statistical Association*. 2005;100: 71–81.  
556 doi:10.1198/016214504000001907
- 557 38. Pritchard JK, Stephens M, Donnelly P. Inference of population structure using multilocus  
558 genotype data. *Genetics*. 2000;155: 945–959.
- 559 39. Danan S, Veyrieras J-B, Lefebvre V. Construction of a potato consensus map and QTL meta-  
560 analysis offer new insights into the genetic architecture of late blight resistance and plant  
561 maturity traits. *BMC Plant Biology*. 2011;11: 16. doi:10.1186/1471-2229-11-16
- 562 40. Elshire RJ, Glaubitz JC, Sun Q, Poland JA, Kawamoto K, Buckler ES, et al. A Robust, Simple  
563 Genotyping-by-Sequencing (GBS) Approach for High Diversity Species. *PLoS ONE*. 2011;6:  
564 e19379. doi:10.1371/journal.pone.0019379
- 565 41. Wang S, Meyer E, McKay JK, Matz MV. 2b-RAD: a simple and flexible method for genome-  
566 wide genotyping. *Nat Methods*. 2012;9: 808–810. doi:10.1038/nmeth.2023
- 567 42. Voorrips RE. MapChart: Software for the Graphical Presentation of Linkage Maps and QTLs. *J*  
568 *Hered*. 2002;93: 77–78. doi:10.1093/jhered/93.1.77
- 569 43. Jaramillo S. Monografía sobre *Phytophthora infestans* (Mont) de Bary. Facultad de Ciencias  
570 Agropecuarias. Universidad Nacional de Colombia. 2003.
- 571 44. Fry B, Myers K, Mayton H, Small I, Danies G. LATE BLIGHT UPDATE 2015. : 4.
- 572 45. Collard BCY, Jahufer MZZ, Brouwer JB, Pang ECK. An introduction to markers, quantitative  
573 trait loci (QTL) mapping and marker-assisted selection for crop improvement: The basic  
574 concepts. *Euphytica*. 2005;142: 169–196. doi:10.1007/s10681-005-1681-5

- 575 46. Balmer D, de Papajewski DV, Planchamp C, Glauser G, Mauch-Mani B. Induced resistance in  
576 maize is based on organ-specific defence responses. *The Plant Journal*. 2013;74: 213–225.  
577 doi:10.1111/tpj.12114
- 578 47. Golkari S, Gilbert J, Prashar S, Procinier JD. Microarray analysis of *Fusarium graminearum*-  
579 induced wheat genes: identification of organ-specific and differentially expressed genes. *Plant*  
580 *Biotechnology Journal*. 2007;5: 38–49. doi:10.1111/j.1467-7652.2006.00213.x
- 581 48. Costanzo S, Simko I, Christ BJ, Haynes KG. QTL analysis of late blight resistance in a diploid  
582 potato family of *Solanum phureja* × *S. stenotomum*. *Theor Appl Genet*. 2005;111: 609–617.  
583 doi:10.1007/s00122-005-2053-1
- 584 49. Simko I, Costanzo S, Ramanjulu V, Christ BJ, Haynes KG. Mapping polygenes for tuber  
585 resistance to late blight in a diploid *Solanum phureja* × *S. stenotomum* hybrid population. *Plant*  
586 *Breeding*. 2006;125: 385–389. doi:10.1111/j.1439-0523.2006.01232.x
- 587 50. Asaro A, Ziegler G, Ziyomo C, Hoekenga OA, Dilkes BP, Baxter I. The Interaction of  
588 Genotype and Environment Determines Variation in the Maize Kernel Ionome. *G3 (Bethesda)*.  
589 2016;6: 4175–4183. doi:10.1534/g3.116.034827
- 590 51. Tétard-Jones C, Kertesz MA, Preziosi RF. Quantitative trait loci mapping of phenotypic  
591 plasticity and genotype-environment interactions in plant and insect performance. *Philos Trans*  
592 *R Soc Lond, B, Biol Sci*. 2011;366: 1368–1379. doi:10.1098/rstb.2010.0356
- 593 52. Dechaine JM, Brock MT, Iniguez-Luy FL, Weing C. Quantitative trait loci × environment  
594 interactions for plant morphology vary over ontogeny in *Brassica rapa*. *New Phytol*. 2014;201:  
595 657–669. doi:10.1111/nph.12520
- 596 53. Ghislain M, Trognitz B, Herrera M del R, Solis J, Casallo G, Vásquez C, et al. Genetic loci  
597 associated with field resistance to late blight in offspring of *Solanum phureja* and *S.tuberosum*  
598 grown under short-day conditions. *Theor Appl Genet*. 2001;103: 433–442. doi:10.1007/s00122-  
599 001-0545-1
- 600 54. Huard-Chauveau C, Perchepied L, Debieu M, Rivas S, Kroj T, Kars I, et al. An atypical kinase  
601 under balancing selection confers broad-spectrum disease resistance in *Arabidopsis*. *PLoS*  
602 *Genet*. 2013;9: e1003766. doi:10.1371/journal.pgen.1003766
- 603 55. Kohorn BD. Cell wall-associated kinases and pectin perception. *J Exp Bot*. 2016;67: 489–494.  
604 doi:10.1093/jxb/erv467
- 605 56. Roux F, Noël L, Rivas S, Roby D. ZRK atypical kinases: emerging signaling components of  
606 plant immunity. *New Phytologist*. 2014;203: 713–716. doi:10.1111/nph.12841
- 607 57. Vásquez AX, Soto Sedano JC, López Carrascal CE, Vásquez AX, Soto Sedano JC, López  
608 Carrascal CE. Unraveling the molecules hidden in the gray shadows of quantitative disease  
609 resistance to pathogens. *Acta Biológica Colombiana*. 2018;23: 5–16.  
610 doi:10.15446/abc.v23n1.66487
- 611 58. Tena G, Boudsocq M, Sheen J. Protein kinase signaling networks in plant innate immunity.  
612 *Curr Opin Plant Biol*. 2011;14: 519–529. doi:10.1016/j.pbi.2011.05.006

- 613 59. Fantino E, Segretin ME, Santin F, Mirkin FG, Ulloa RM. Analysis of the potato calcium-  
614 dependent protein kinase family and characterization of StCDPK7, a member induced upon  
615 infection with *Phytophthora infestans*. *Plant Cell Rep.* 2017;36: 1137–1157.  
616 doi:10.1007/s00299-017-2144-x
- 617 60. Bradeen JM, Iorizzo M, Mollov DS, Raasch J, Kramer LC, Millett BP, et al. Higher Copy  
618 Numbers of the Potato RB Transgene Correspond to Enhanced Transcript and Late Blight  
619 Resistance Levels. *MPMI.* 2009;22: 437–446. doi:10.1094/MPMI-22-4-0437
- 620

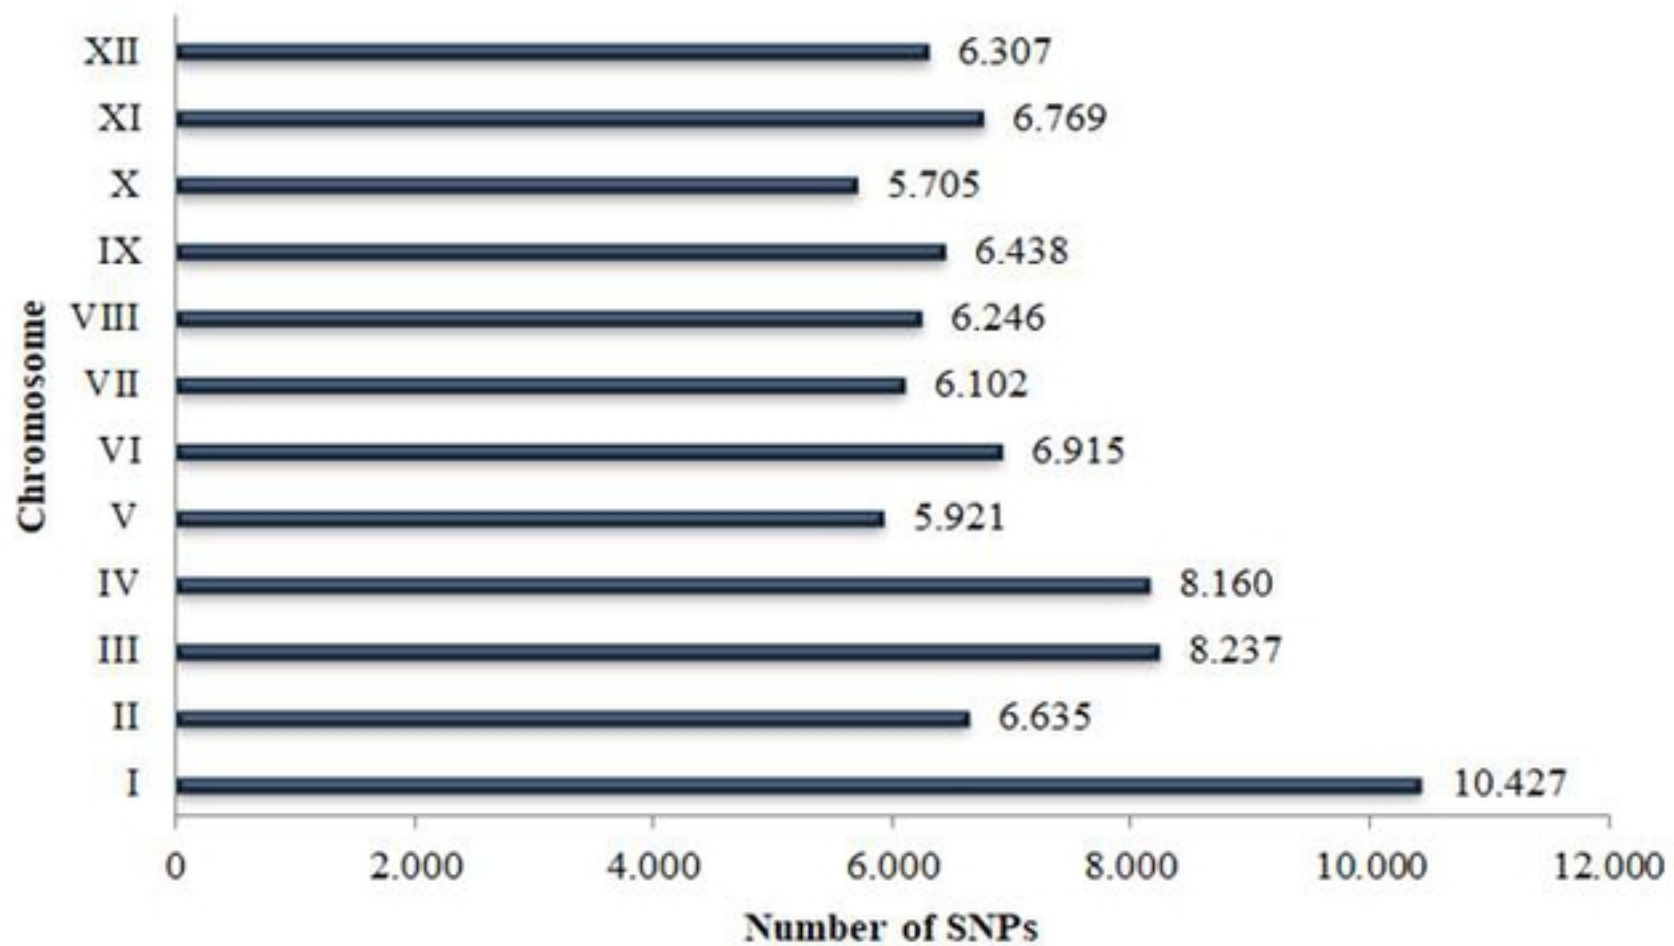

**Figure 1.** Number of SNPs mapped for each chromosome in the potato genome. Numbers on the right of bars show the total SNPs identified through GBS and 2b-RAD located in each chromosome as indicated by roman letters on y-axis.



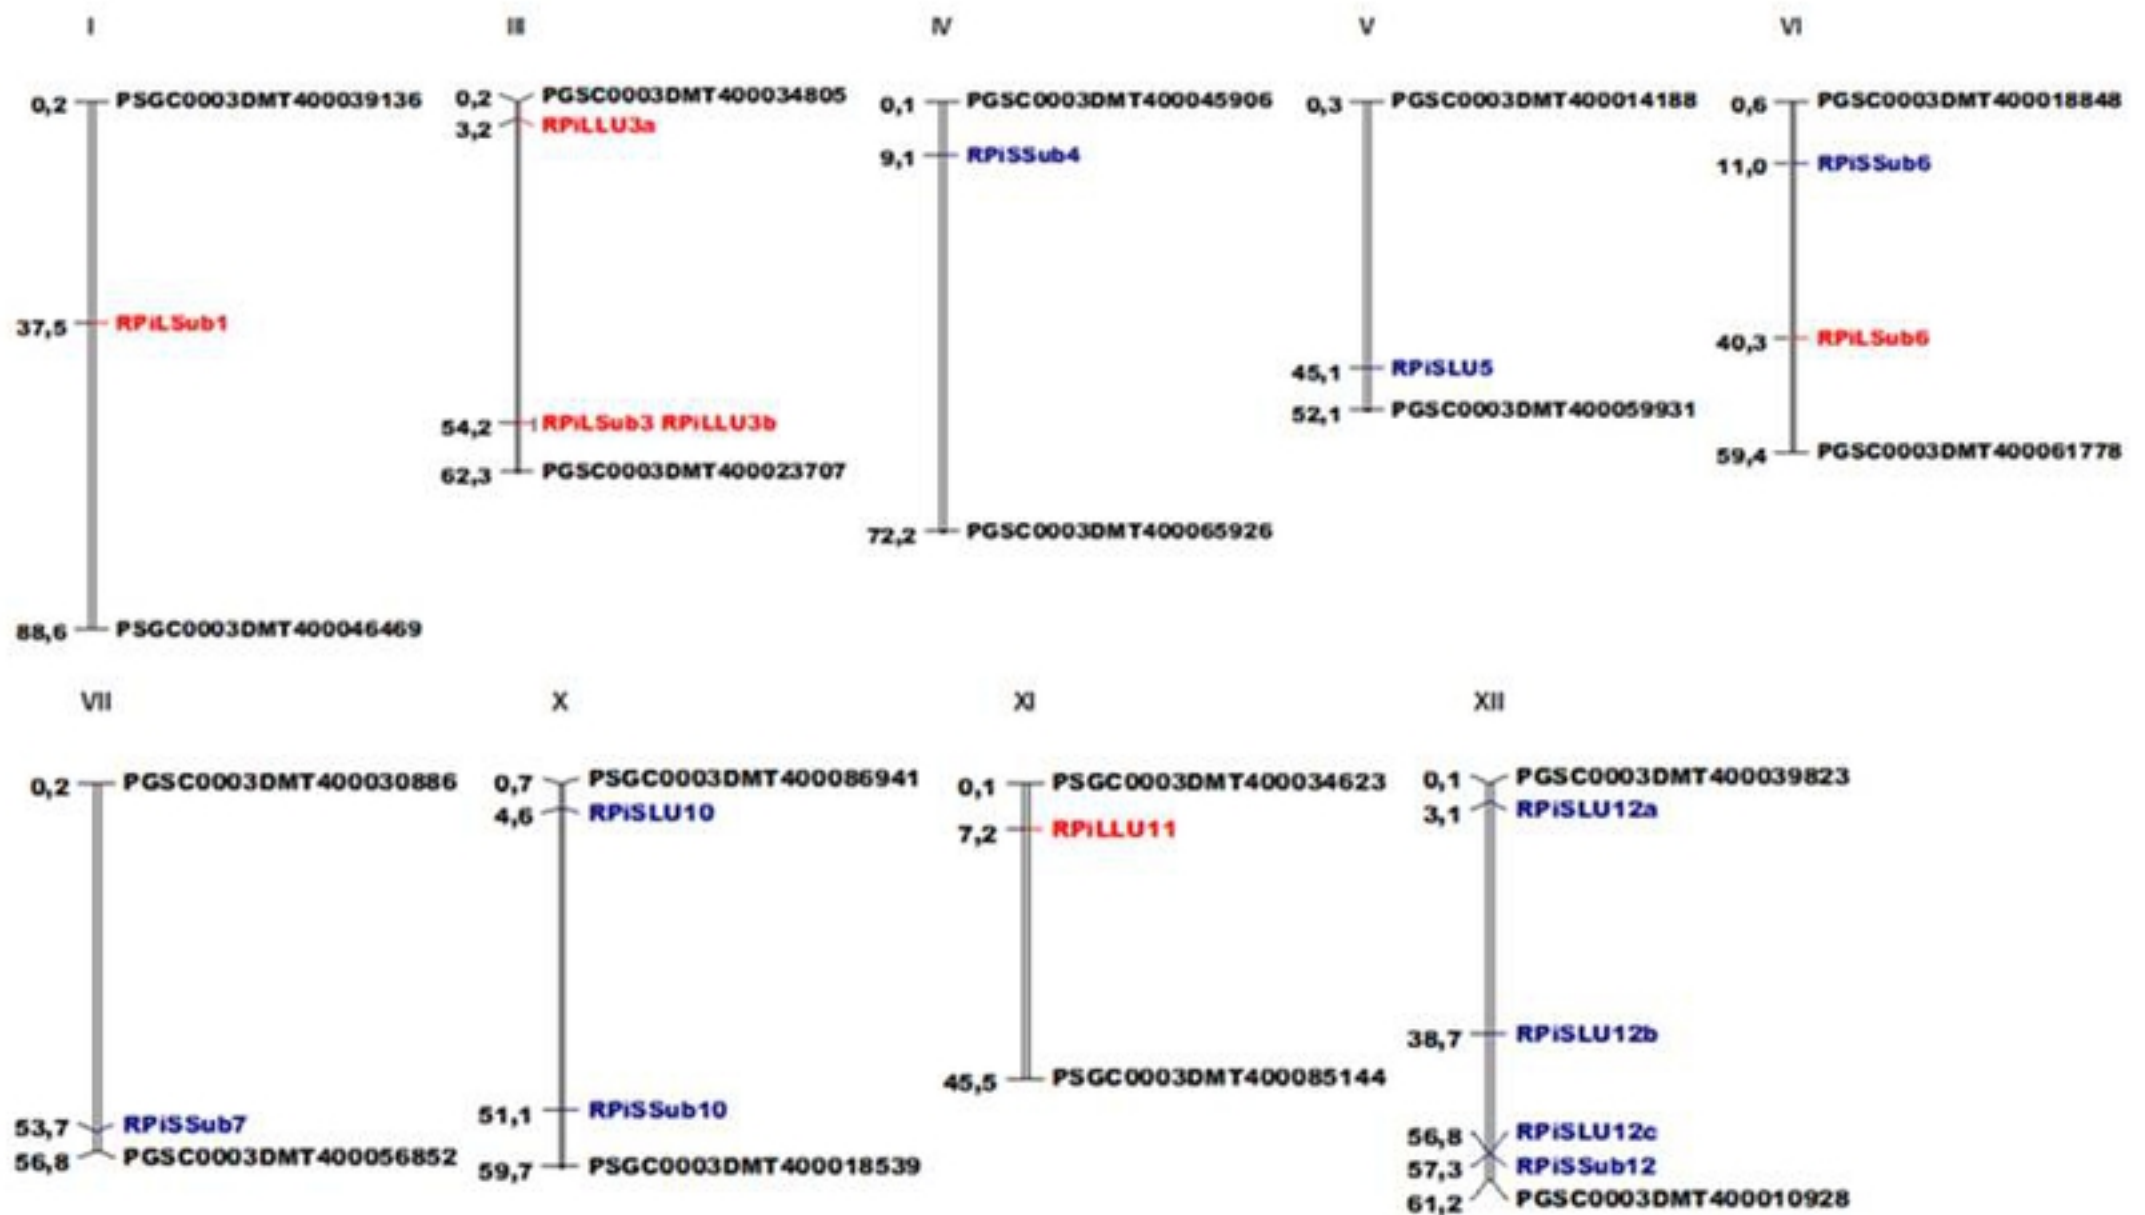

**Figure 3. SNPs mapped in the potato chromosomes of Group Phureja.** Genomic distances are given in Mbp according to the PGSC V4.03 pseudomolecules (Xu et al., 2011). In red are presented the QTL for late blight resistance detected in the phenotypic response for foliage, while in blue are presented those detected for stems. In black are presented the markers that limit each chromosome in the potato genome. Diagram plotted using MapChart software (Voorrips, 2002).
